# Supplementary material for: Oxidation and chalcogenylative disproportionation of anionic phosphide ligands in yttrium complexes with elemental sulfur and selenium
Source: Royal Society of Chemistry journal article supplement (doi:10.1039/c9dt01537j), 2019-01-01

## Supporting Information

### Oxidation and Disproportionation of Anionic Phosphide Ligands in Yttrium Complexes with Elemental Sulfur and Selenium

Fangjun Zhang,<sup>a</sup> Weiyin Yi,<sup>a</sup> Jie Zhang,<sup>\*, a</sup> Qing You,<sup>a</sup> Linhong Weng,<sup>a</sup> and  
Xigeng Zhou<sup>\*, a</sup>

<sup>a</sup> Department of Chemistry, Shanghai Key Laboratory of Molecular Catalysis and Innovative Materials  
Fudan University, Shanghai 200433, People's Republic of China

E-mail: [zhangjie@fudan.edu.cn](mailto:zhangjie@fudan.edu.cn); [xgzhou@fudan.edu.cn](mailto:xgzhou@fudan.edu.cn)

## Contents

Scanned  $^1\text{H}$ ,  $^{13}\text{C}$  and  $^{31}\text{P}$  NMR spectra of all new compounds



**Figure 3.**  $^{31}\text{P}$  NMR of  $(\text{Tp}^{\text{Me}_2})\text{CpY}[\text{S}_2\text{PPh}_2]$  (2) in  $\text{D}_8\text{-THF}$

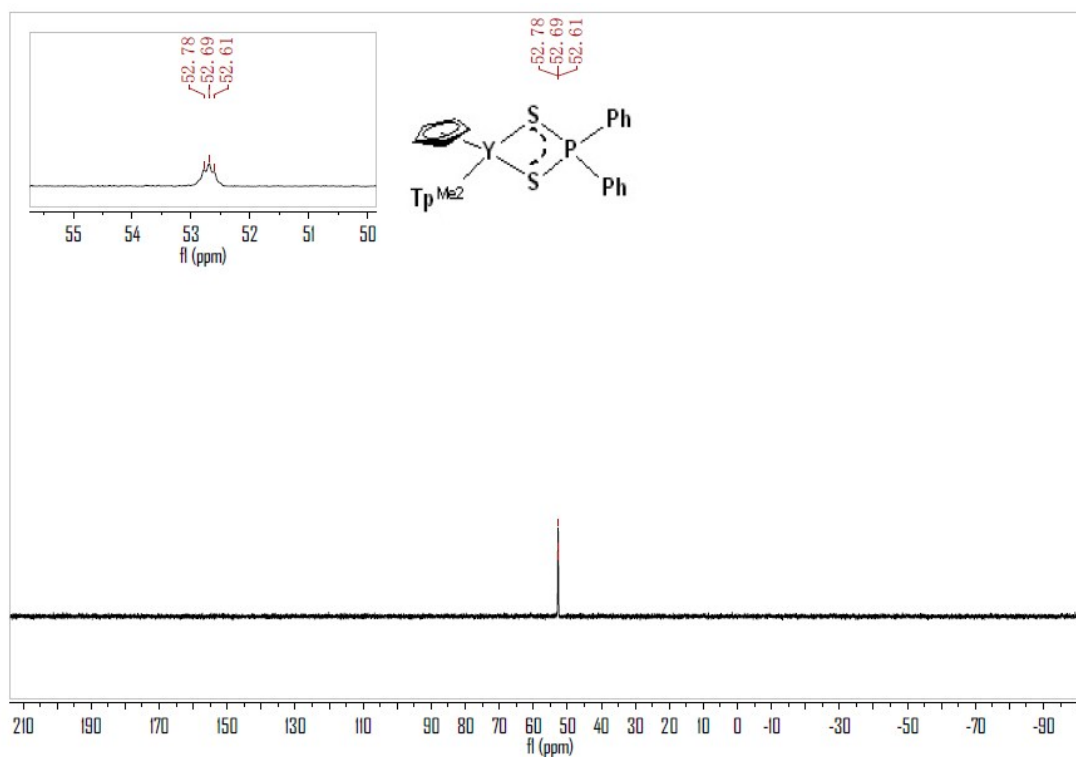

**Figure 4.**  $^1\text{H}$  NMR of  $(\text{Tp}^{\text{Me}_2})\text{CpY}[\text{O}(\text{CH}_2)_4\text{PPh}_2](\text{THF})$  (3) in  $\text{D}_8\text{-THF}$

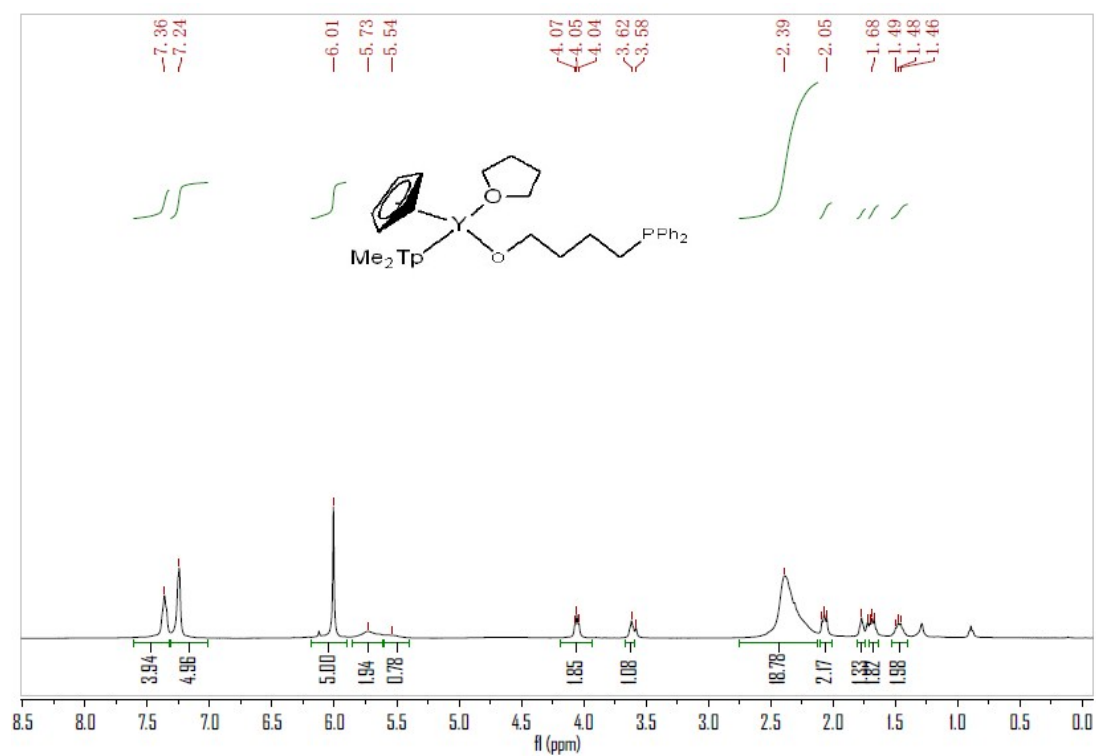

**Figure 5.**  $^{13}\text{C}$  NMR of  $(\text{Tp}^{\text{Me}_2})\text{CpY}[\text{O}(\text{CH}_2)_4\text{PPh}_2](\text{THF})$  (3) in  $\text{D}_8\text{-THF}$

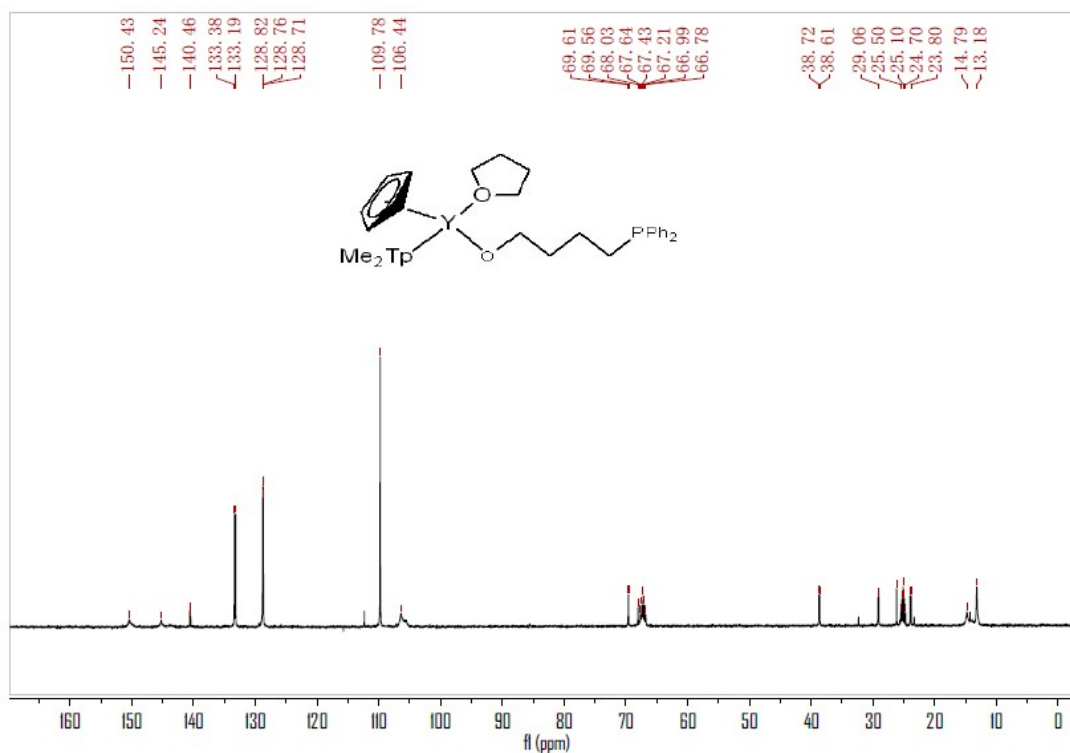

**Figure 6.**  $^{31}\text{P}$  NMR of  $(\text{Tp}^{\text{Me}_2})\text{CpY}[\text{O}(\text{CH}_2)_4\text{PPh}_2](\text{THF})$  (3) in  $\text{D}_8\text{-THF}$

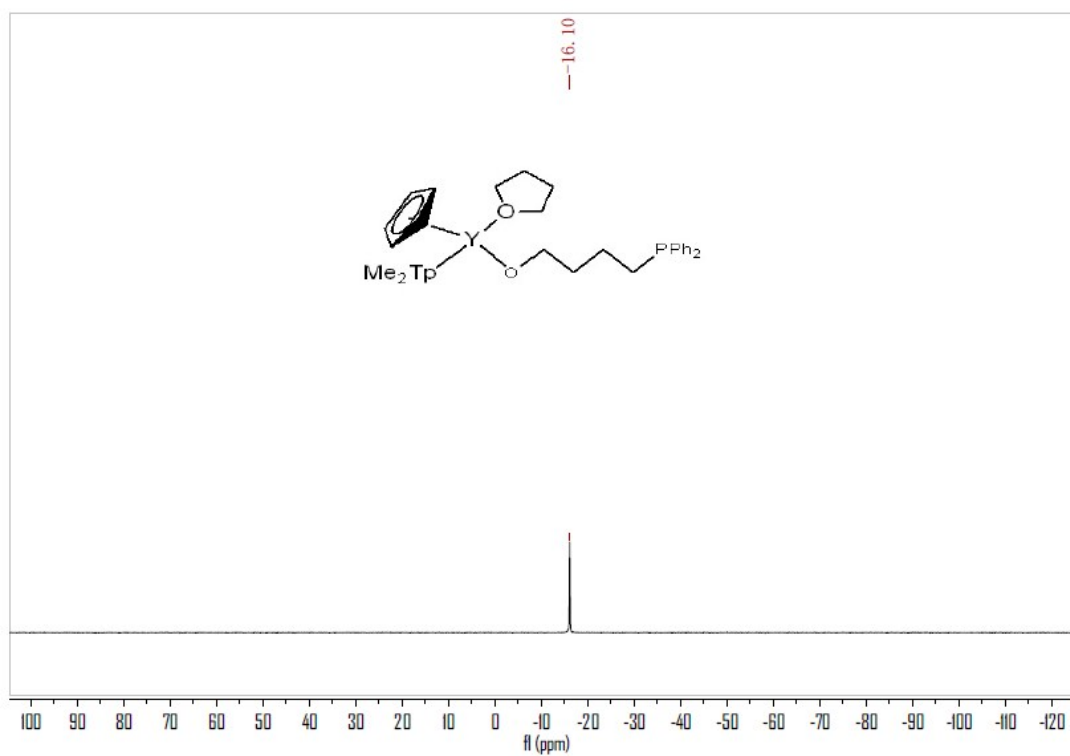

**Figure 7.**  $^1\text{H}$  NMR of  $(\text{Tp}^{\text{Me}_2})\text{CpYOPPh}_2(\text{THF})$  ( $4^0$ ) in  $\text{D}_8\text{-THF}$

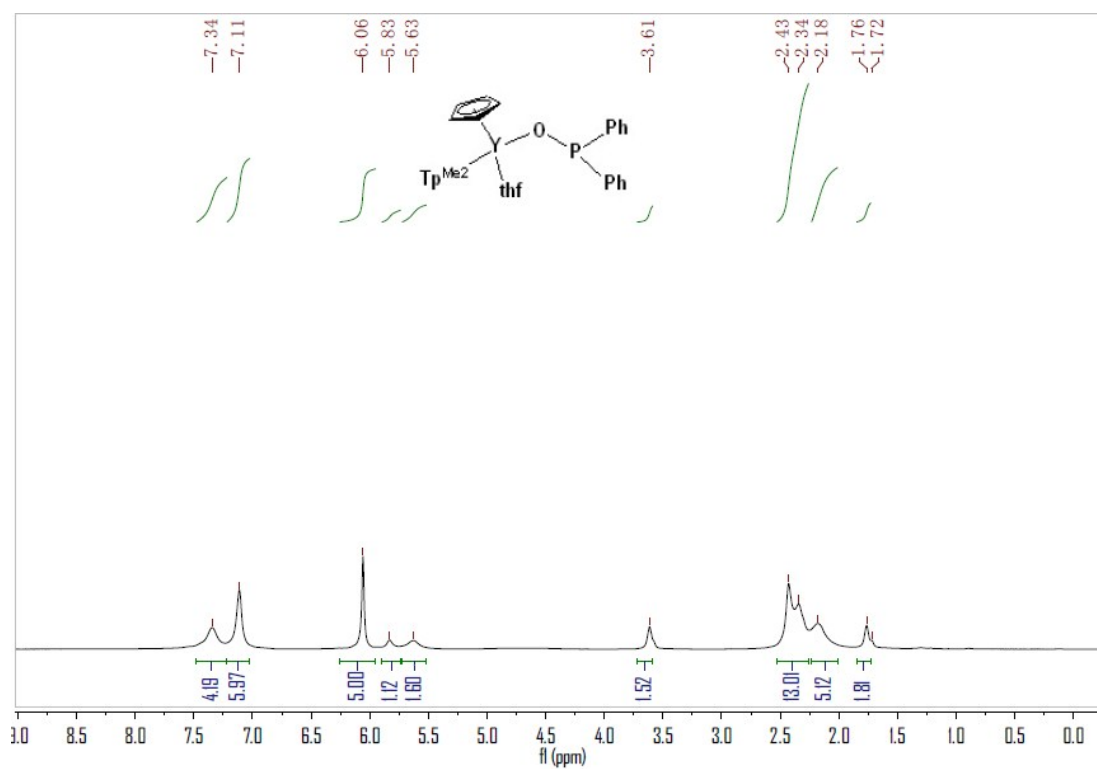

**Figure 8.**  $^{13}\text{C}$  NMR of  $(\text{Tp}^{\text{Me}_2})\text{CpYOPPh}_2(\text{THF})$  ( $4^0$ ) in  $\text{D}_8\text{-THF}$

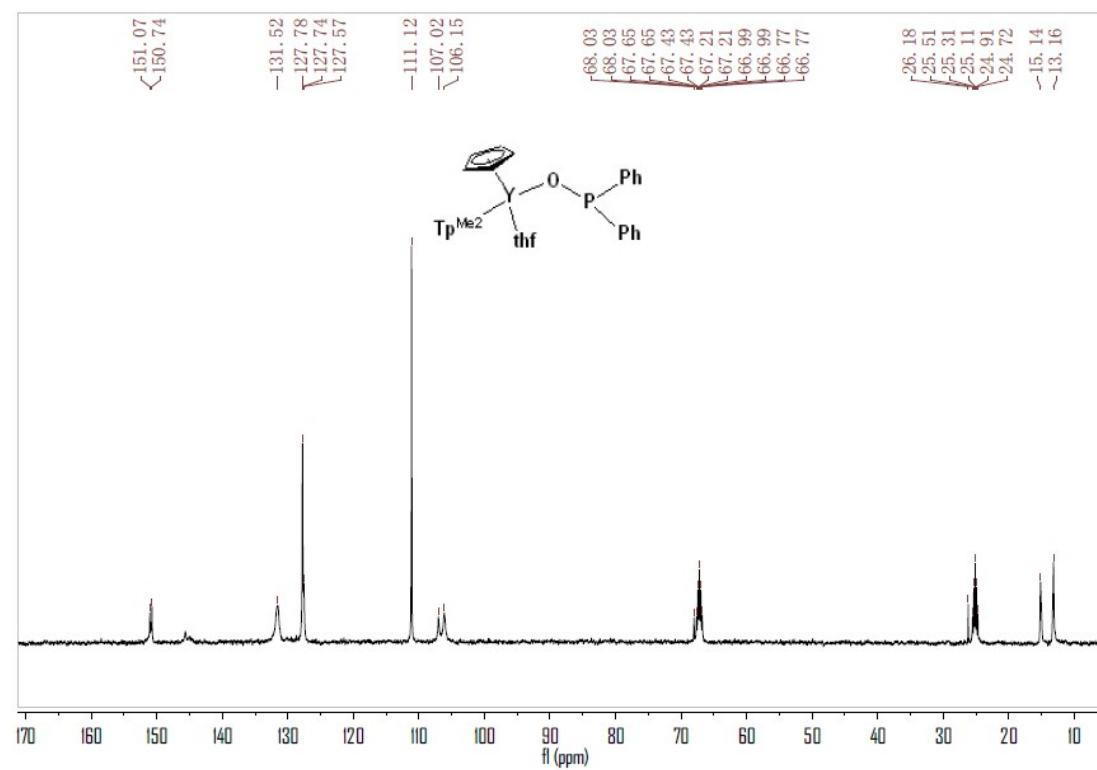

**Figure 9.**  $^{31}\text{P}$  NMR of  $(\text{Tp}^{\text{Me}_2})\text{CpYOPPh}_2(\text{THF})$  ( $4^{\text{O}}$ ) in  $\text{D}_8\text{-THF}$

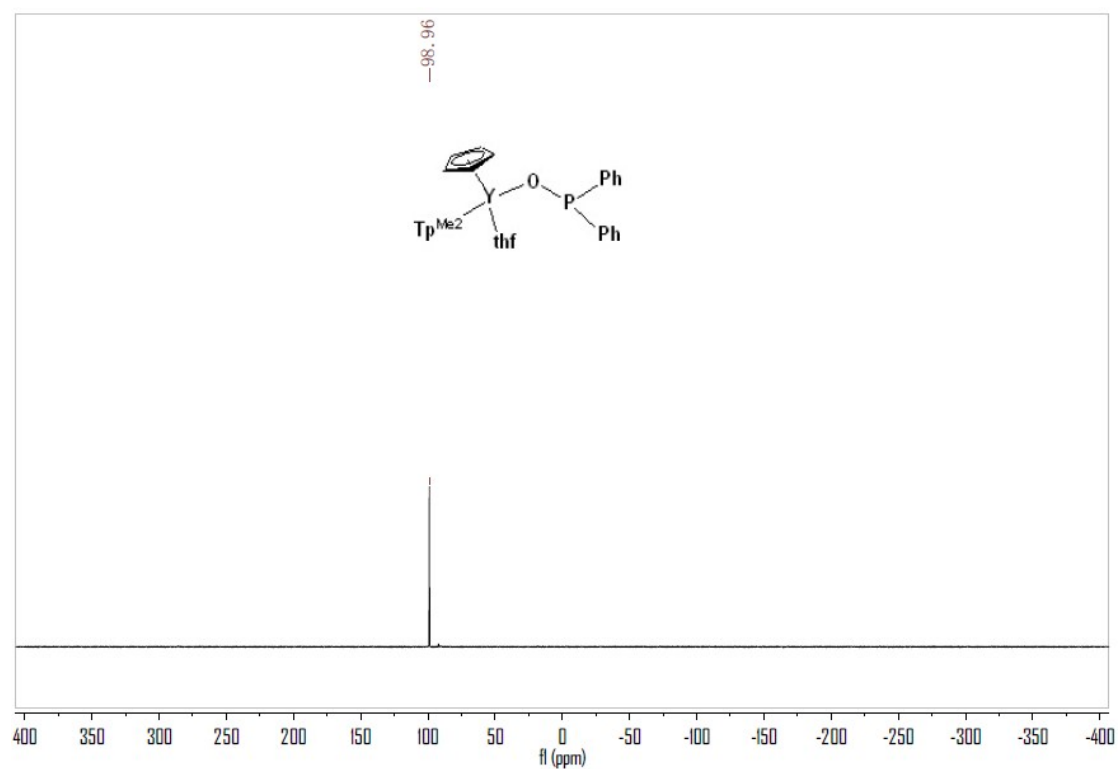

**Figure 10.**  $^1\text{H}$  NMR of  $(\text{Tp}^{\text{Me}_2})\text{CpYSPPPh}_2(\text{THF})$  ( $4^{\text{S}}$ ) in  $\text{D}_8\text{-THF}$

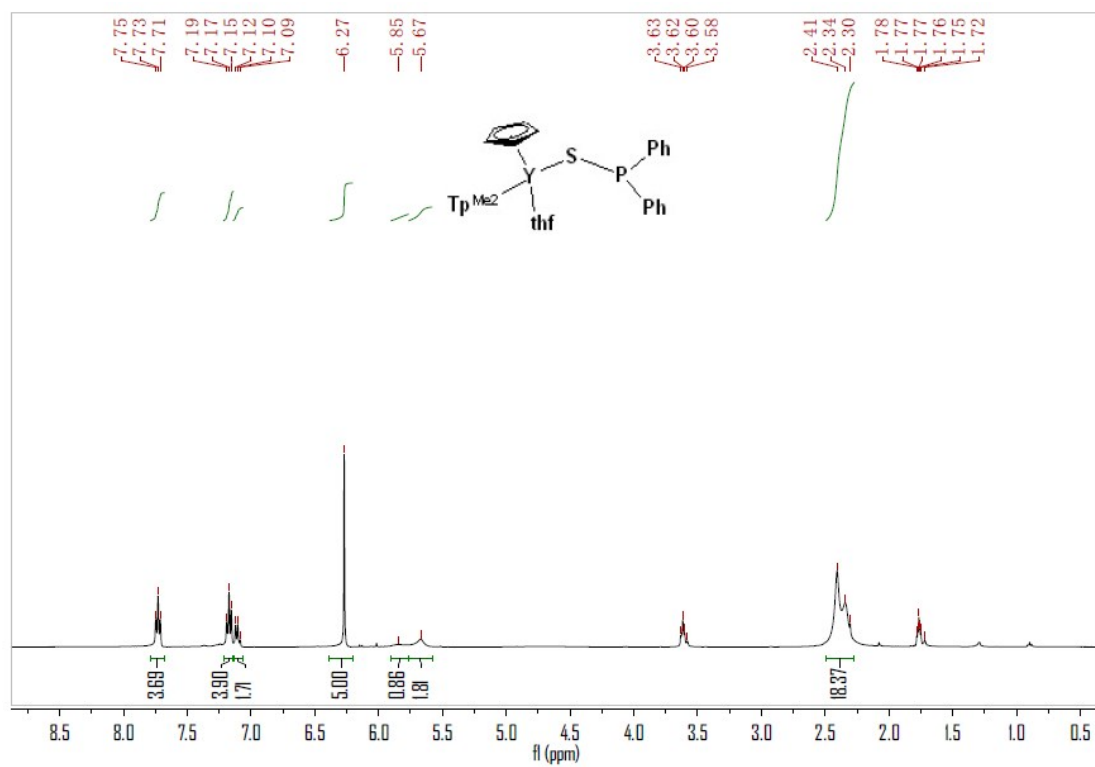

**Figure 11.**  $^{13}\text{C}$  NMR of  $(\text{Tp}^{\text{Me}_2})\text{CpYSPPH}_2(\text{THF})$  ( $4^{\text{S}}$ ) in  $\text{D}_8\text{-THF}$

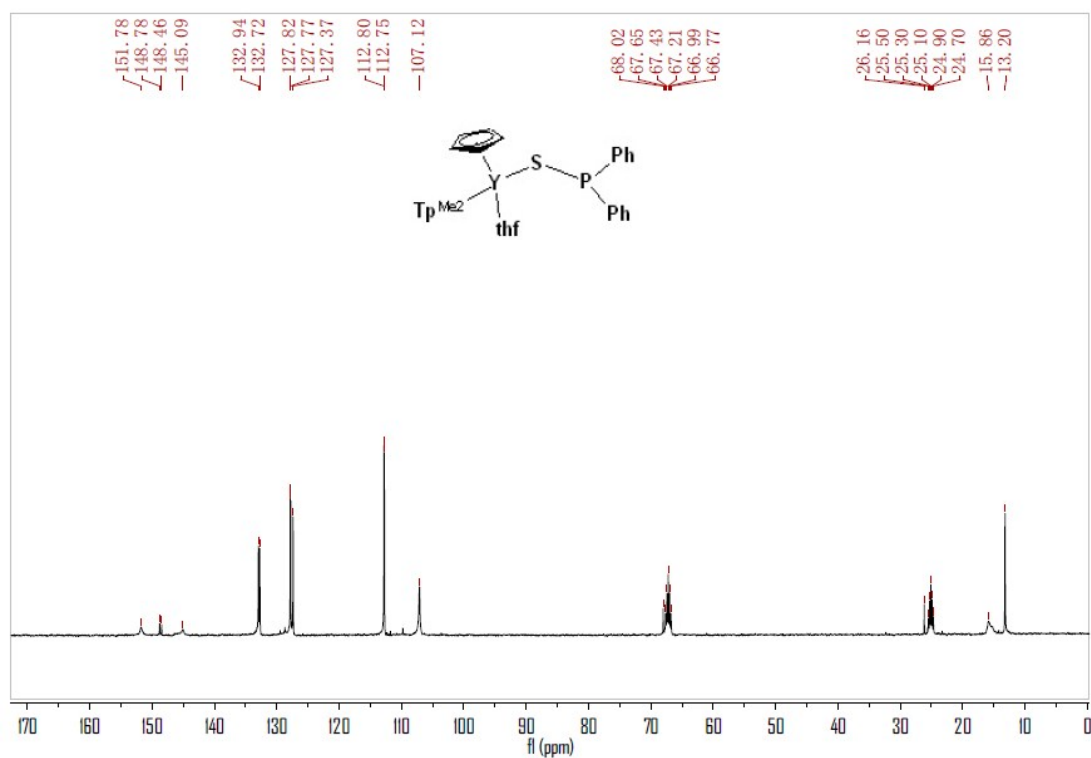

**Figure 12.**  $^{31}\text{P}$  NMR of  $(\text{Tp}^{\text{Me}_2})\text{CpYSPPH}_2(\text{THF})$  ( $4^{\text{S}}$ ) in  $\text{D}_8\text{-THF}$

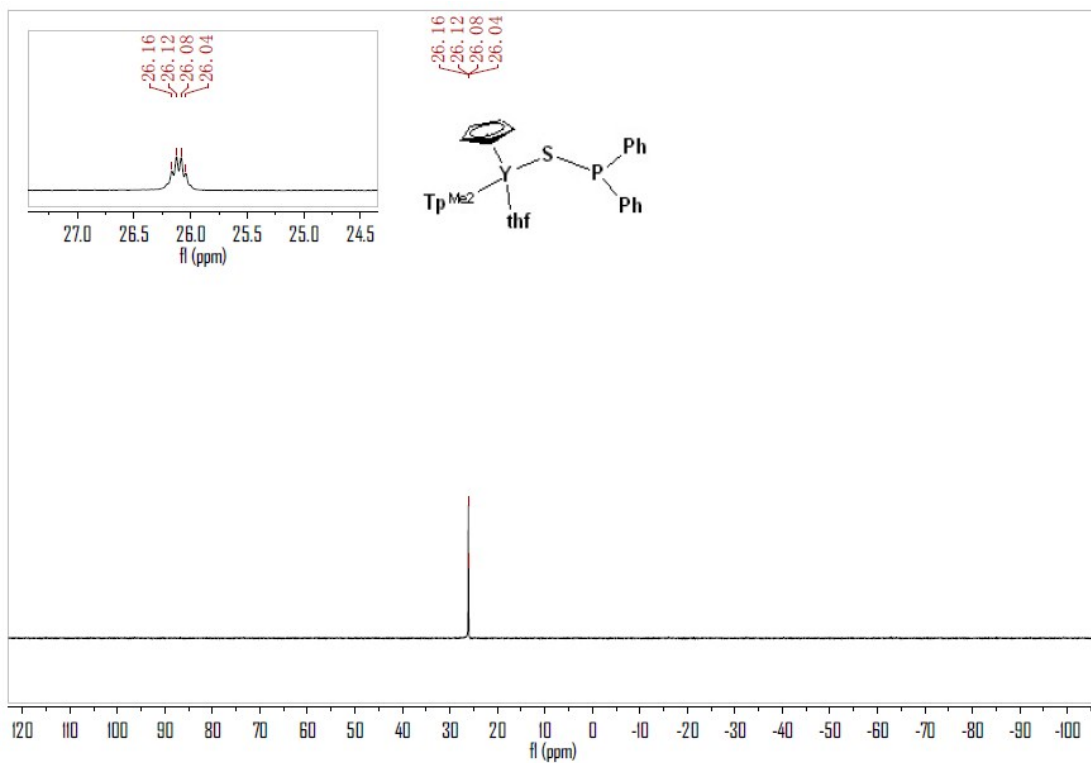

**Figure 13.**  $^1\text{H}$  NMR of  $(\text{Tp}^{\text{Me}_2})\text{CpYSePPh}_2(\text{THF})$  ( $4^{\text{Se}}$ ) in  $\text{D}_8\text{-THF}$

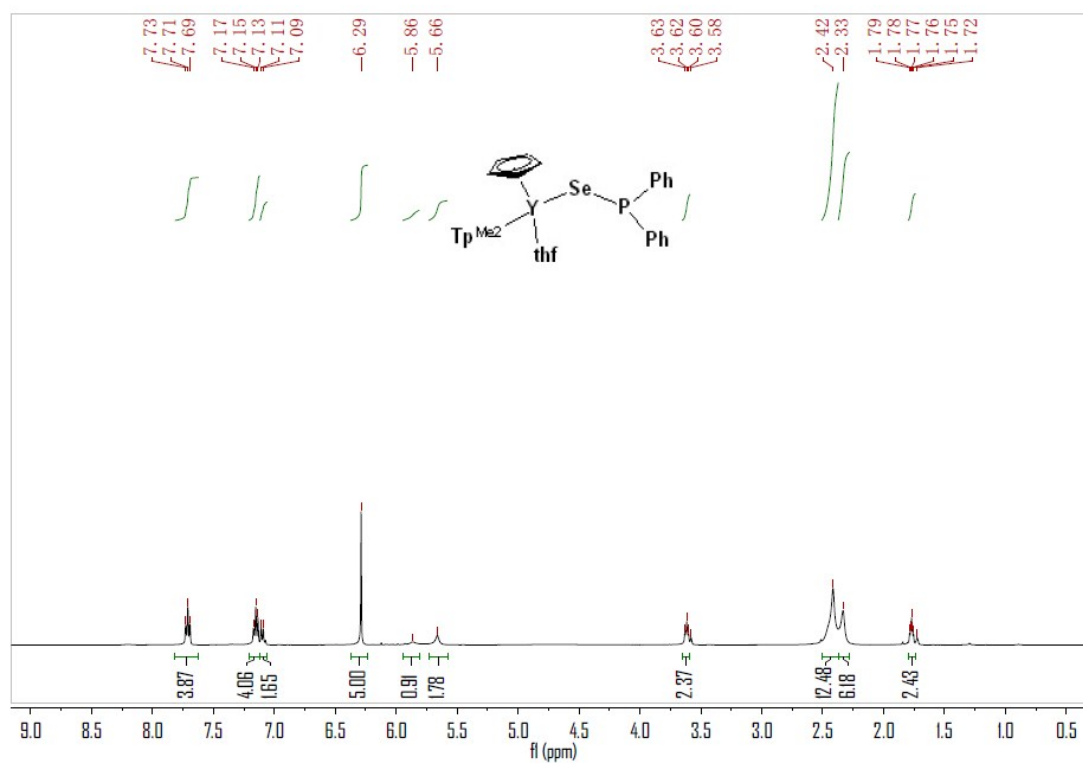

**Figure 14.**  $^{13}\text{C}$  NMR of  $(\text{Tp}^{\text{Me}_2})\text{CpYSePPh}_2(\text{THF})$  ( $4^{\text{Se}}$ ) in  $\text{D}_8\text{-THF}$

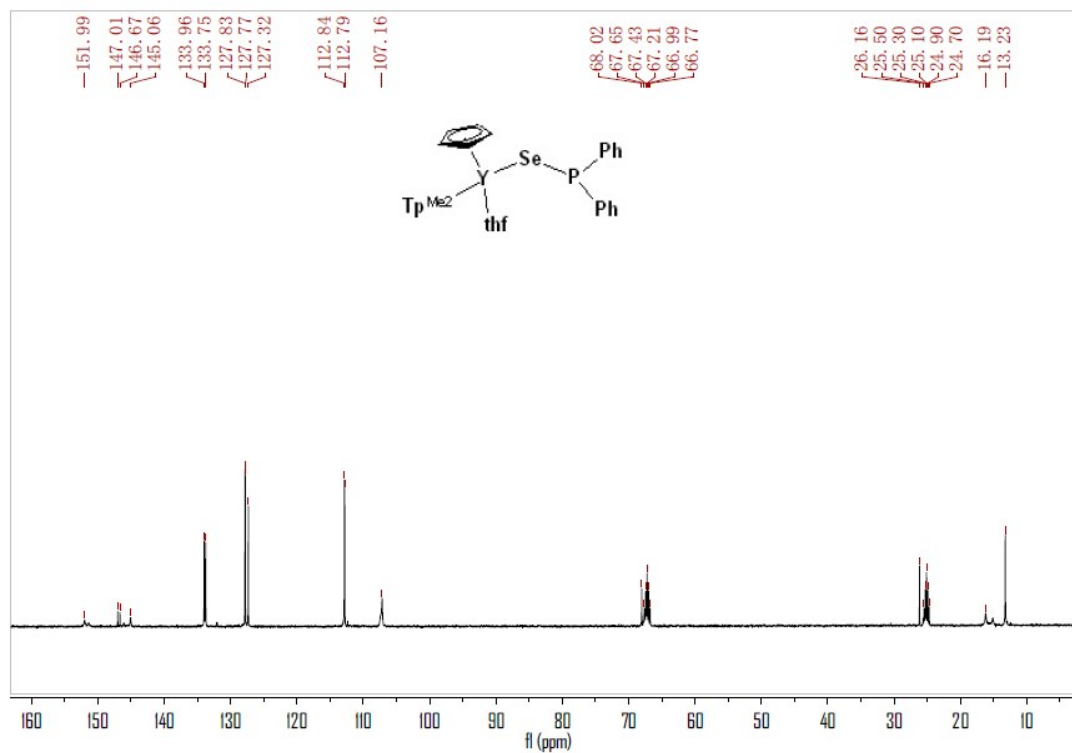

**Figure 15.**  $^{31}\text{P}$  NMR of  $(\text{Tp}^{\text{Me}_2})\text{CpYSePPh}_2(\text{THF})$  ( $4^{\text{Se}}$ ) in  $\text{D}_8\text{-THF}$

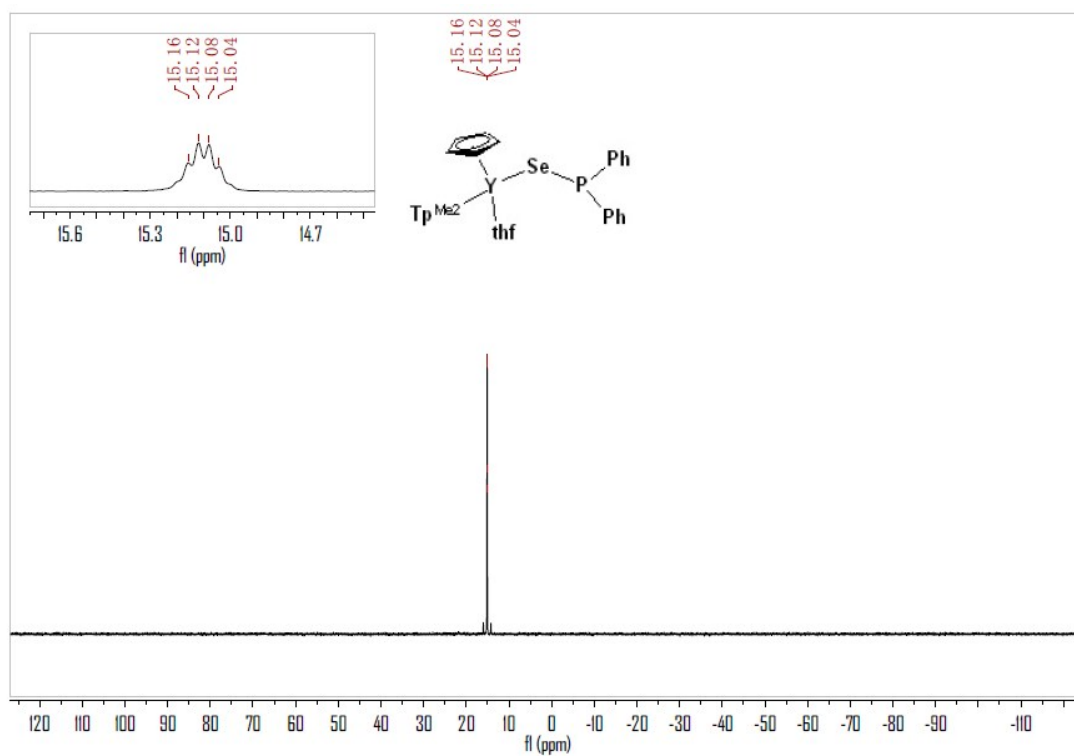

**Figure 16.**  $^1\text{H}$  NMR of  $(\text{Tp}^{\text{Me}_2})\text{CpY}[\text{OP}(\text{S})\text{Ph}_2](\text{THF})$  ( $6^{\text{S}}$ ) in  $\text{D}_6\text{-C}_6\text{H}_6$

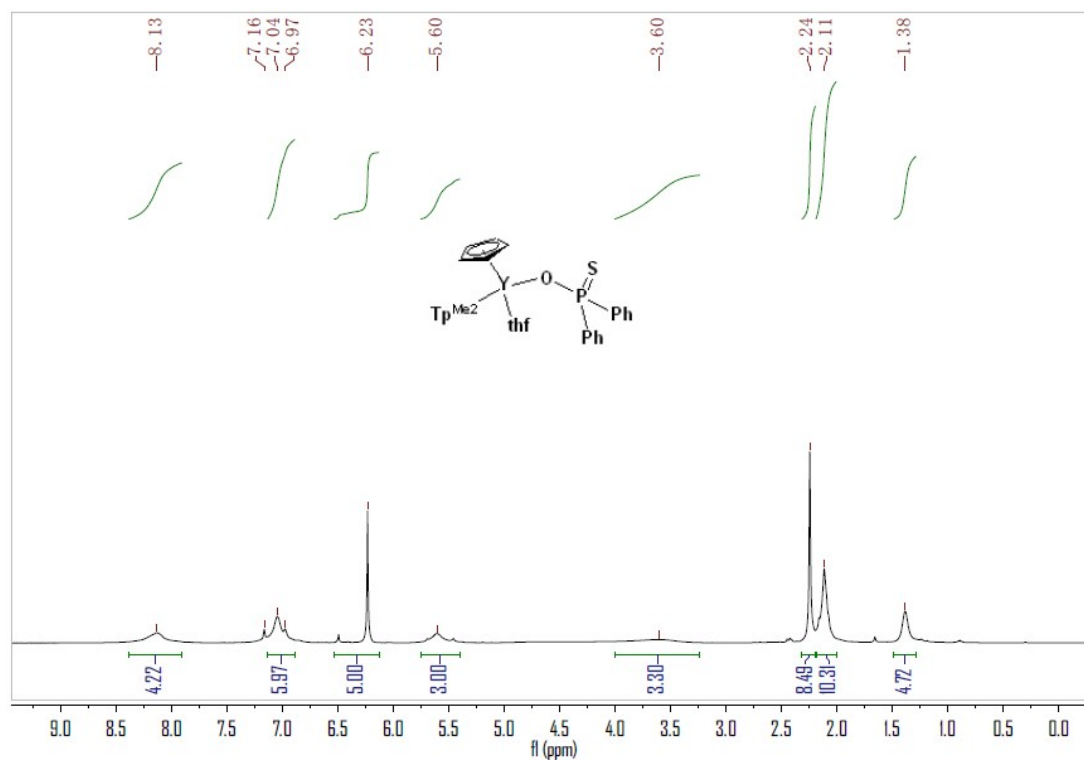

**Figure 17.**  $^{13}\text{C}$  NMR of  $(\text{Tp}^{\text{Me}_2}) \text{CpY}[\text{OP}(\text{S})\text{Ph}_2] (\text{THF}) (6^{\text{S}})$  in  $\text{D}_6\text{-C}_6\text{H}_6$

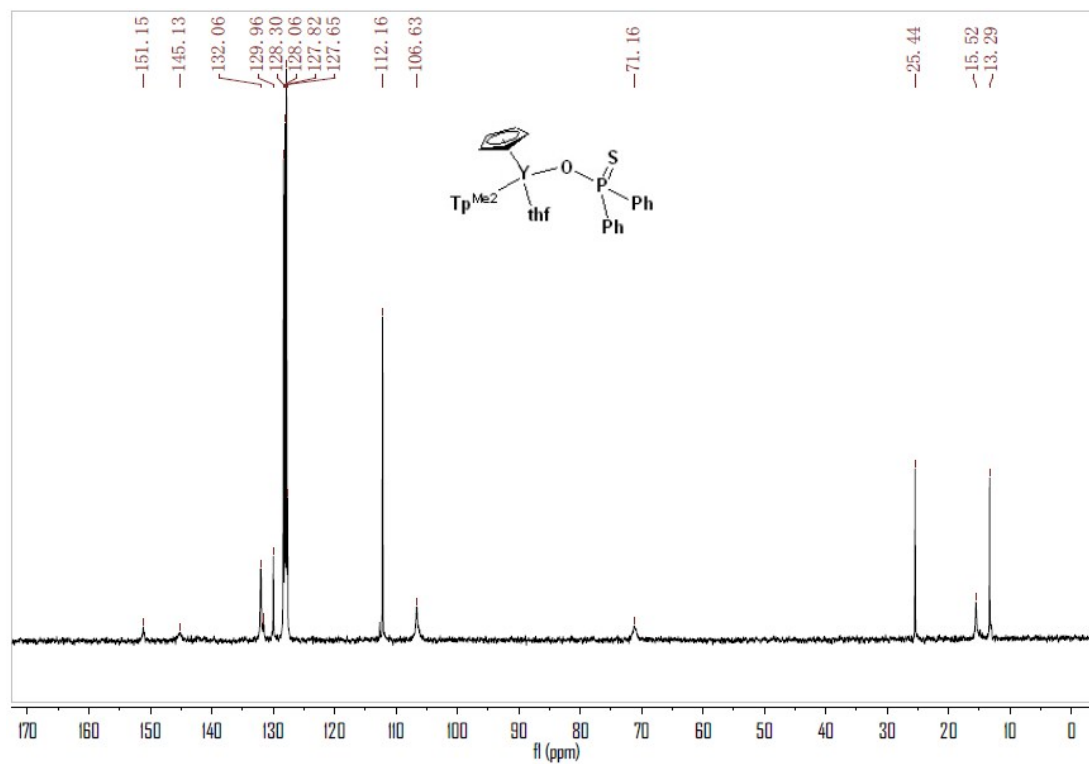

**Figure 18.**  $^{31}\text{P}$  NMR of  $(\text{Tp}^{\text{Me}_2}) \text{CpY}[\text{OP}(\text{S})\text{Ph}_2] (\text{THF}) (6^{\text{S}})$  in  $\text{D}_6\text{-C}_6\text{H}_6$

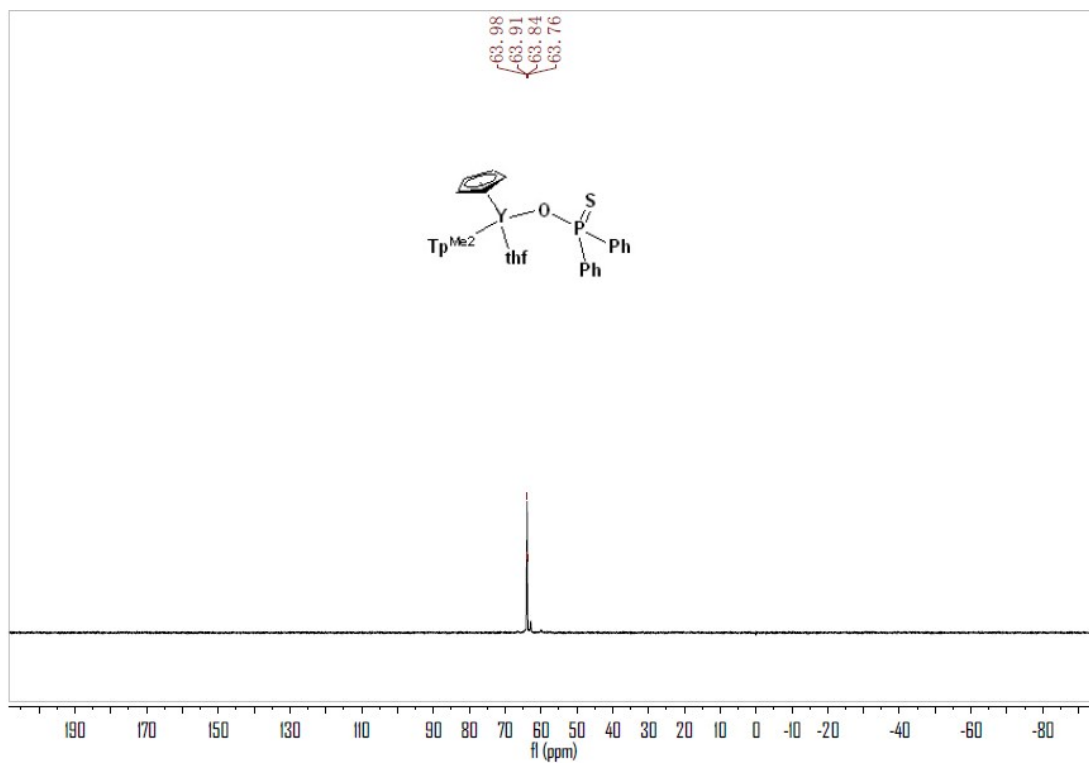

**Figure 19.**  $^1\text{H}$  NMR of  $(\text{Tp}^{\text{Me}_2})\text{CpY}[\text{OP}(\text{Se})\text{Ph}_2](\text{THF})$  ( $6^{\text{Se}}$ ) in  $\text{D}_8\text{-THF}$

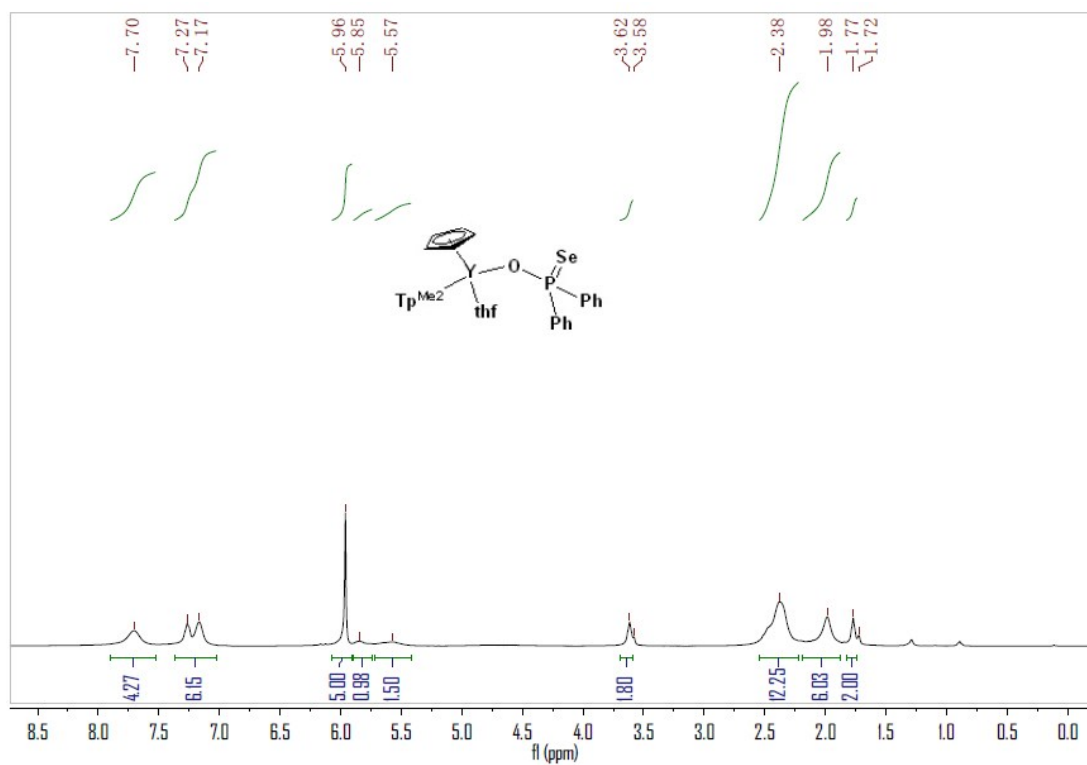

**Figure 20.**  $^{13}\text{C}$  NMR of  $(\text{Tp}^{\text{Me}_2})\text{CpY}[\text{OP}(\text{Se})\text{Ph}_2](\text{THF})$  ( $6^{\text{Se}}$ ) in  $\text{D}_8\text{-THF}$

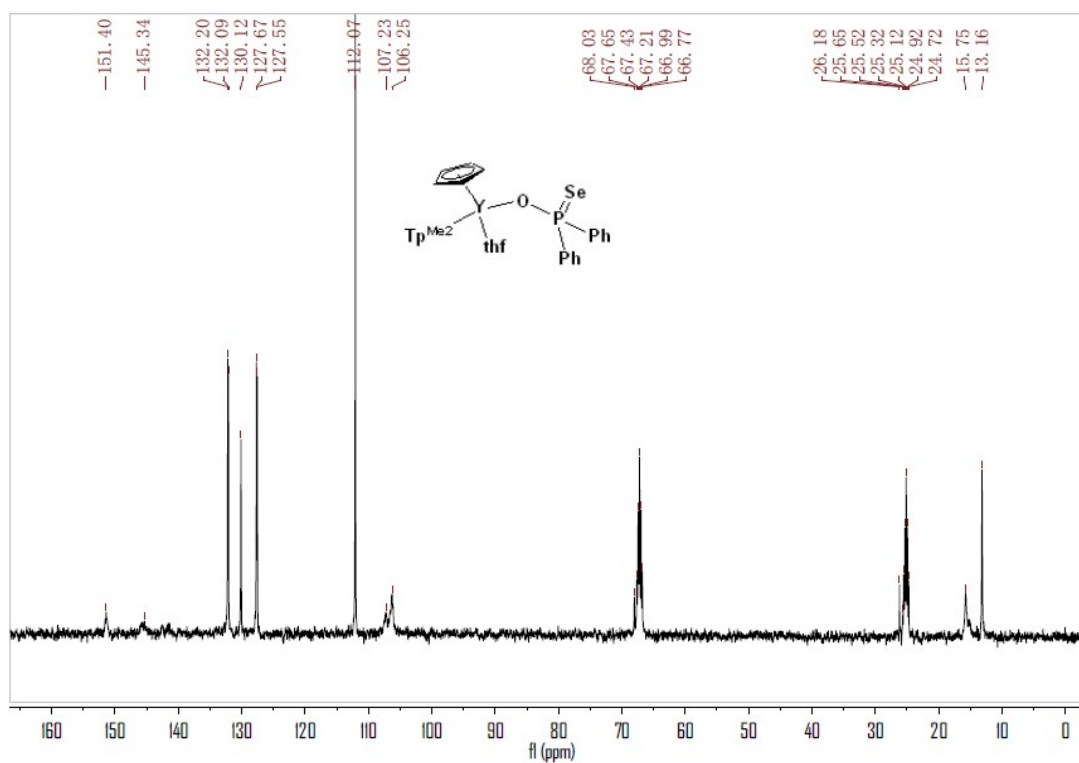

**Figure 21.**  $^{31}\text{P}$  NMR of  $(\text{Tp}^{\text{Me}_2}) \text{CpY}[\text{OP}(\text{Se})\text{Ph}_2] (\text{THF}) (6^{\text{Se}})$  in  $\text{D}_8\text{-THF}$

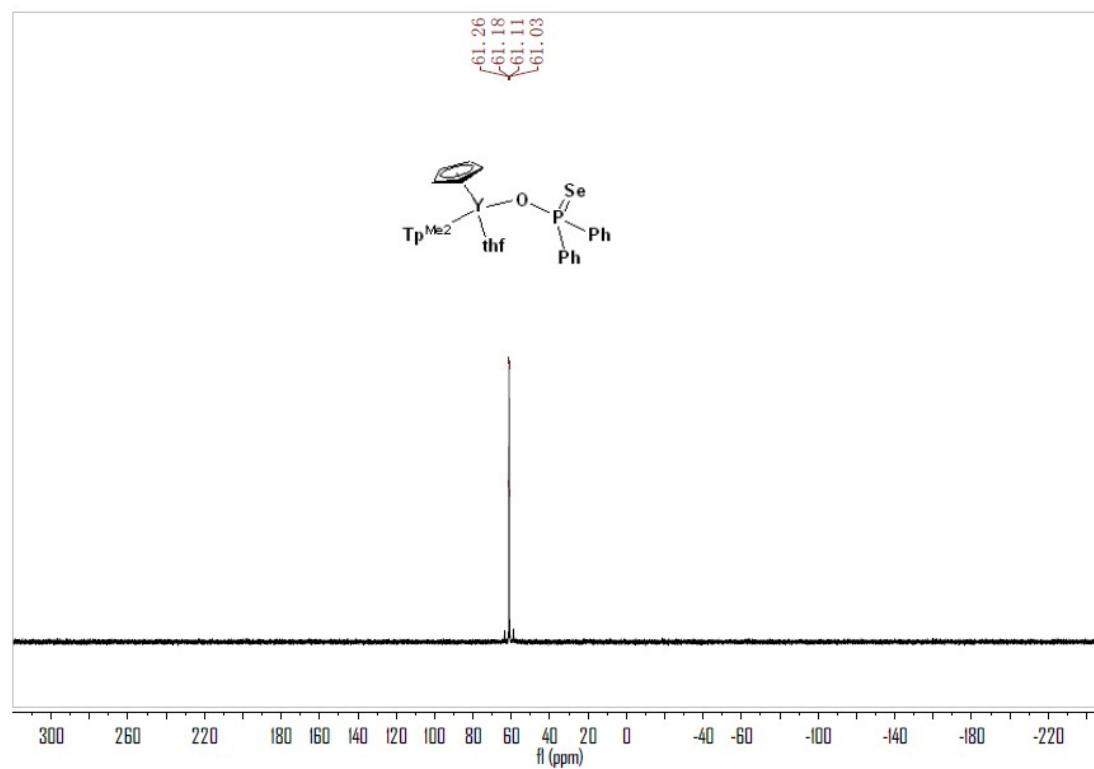

**Figure 22.**  $^{31}\text{P}$  NMR experiments of the transformation from  $4^{\text{S}}$  to 2 and 3 in  $\text{D}_8\text{-THF}$

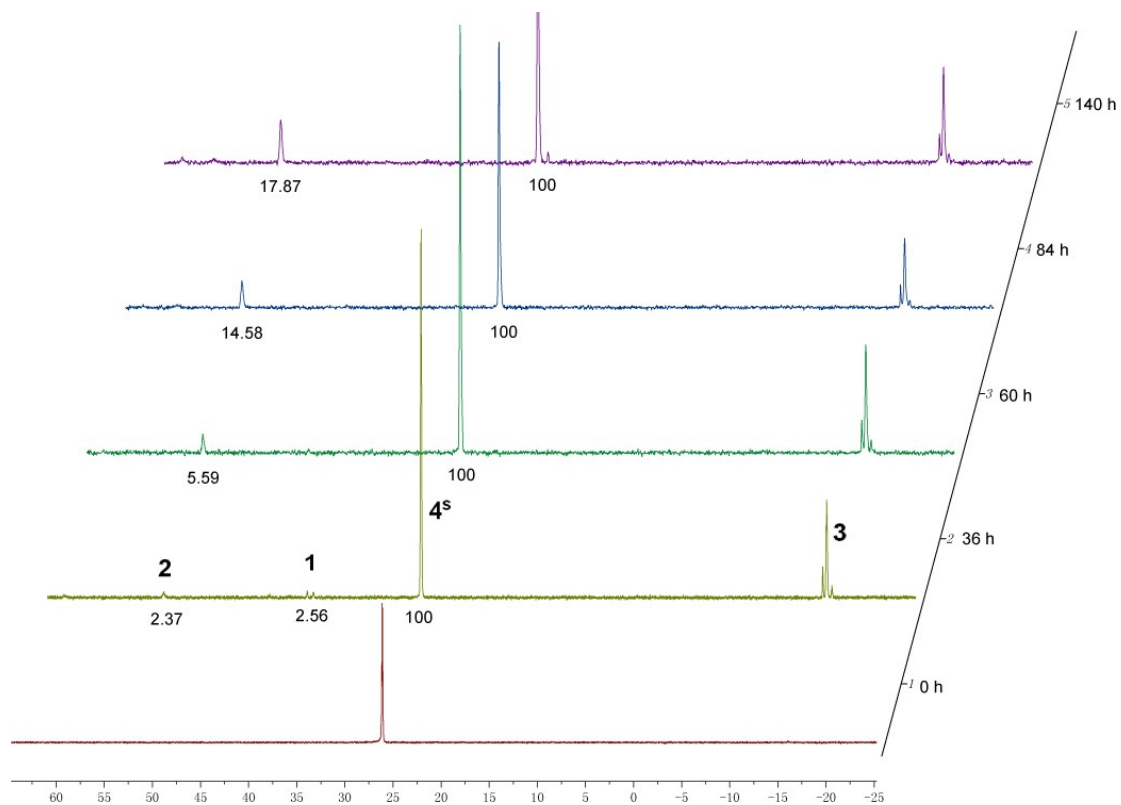

Supplement: c9dt01537j1.pdf [file c9dt01537j1.pdf]
